# Supplementary material for: Uncovering the impact of urban functional zones on air quality in China
Source: Copernicus journal article supplement (doi:10.5194/acp-25-10421-2025), 2025-09-12
Supplement: Supplementary file 1 [file acp-25-10421-2025-supplement.pdf]

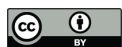

*Supplement of*

## **Uncovering the impact of urban functional zones on air quality in China**

**Lulu Yuan et al.**

*Correspondence to:* Wenchao Han ([han.wenchao@craes.org.cn](mailto:han.wenchao@craes.org.cn)) and Yang Wang ([wang\\_yang@lzu.edu.cn](mailto:wang_yang@lzu.edu.cn))

The copyright of individual parts of the supplement might differ from the article licence.

**Table S1.** Variation differences in pollutant concentrations among different urban scale (low density-high density).

|                               | PM <sub>2.5</sub> | PM <sub>10</sub> | SO <sub>2</sub> | NO <sub>2</sub> | O <sub>3</sub> | CO     |
|-------------------------------|-------------------|------------------|-----------------|-----------------|----------------|--------|
| Residential                   | 0.23%             | 1.01%            | 4.17%           | 0.19%           | -1.28%         | -0.43% |
| Commercial                    | 2.33%             | 1.66%            | 4.65%           | 1.75%           | -1.53%         | 1.22%  |
| Industrial                    | 1.76%             | 1.25%            | 6.26%           | 2.10%           | -0.92%         | 0.93%  |
| Transportation                | -0.33%            | 1.63%            | 2.73%           | 4.59%           | -0.33%         | 1.10%  |
| Public management and service | 4.47%             | 3.77%            | 5.28%           | 3.88%           | -2.04%         | 0.39%  |

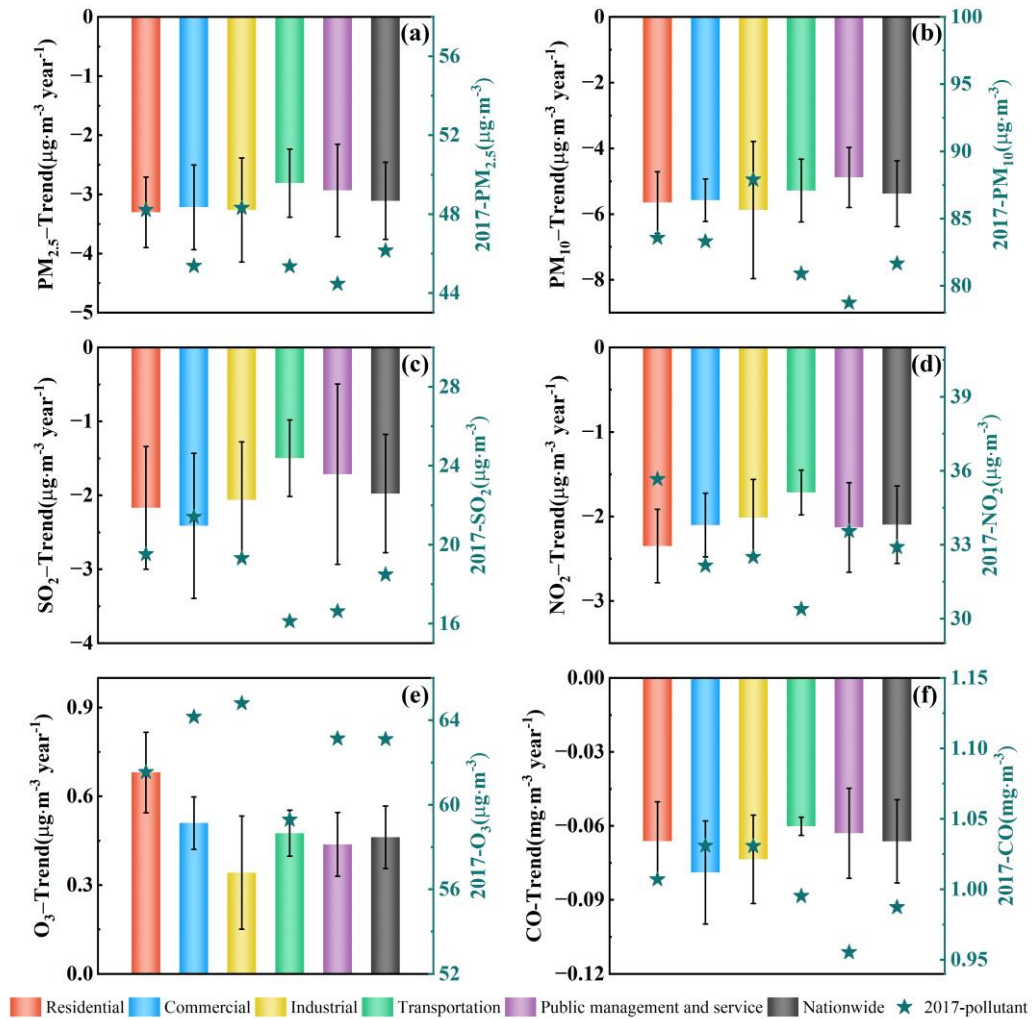

**Figure S1.** Average annual variation of PM<sub>2.5</sub> (a), PM<sub>10</sub> (b), SO<sub>2</sub> (c), NO<sub>2</sub> (d), O<sub>3</sub> (e), and CO (f) concentrations in various functional zones of Chinese cities.

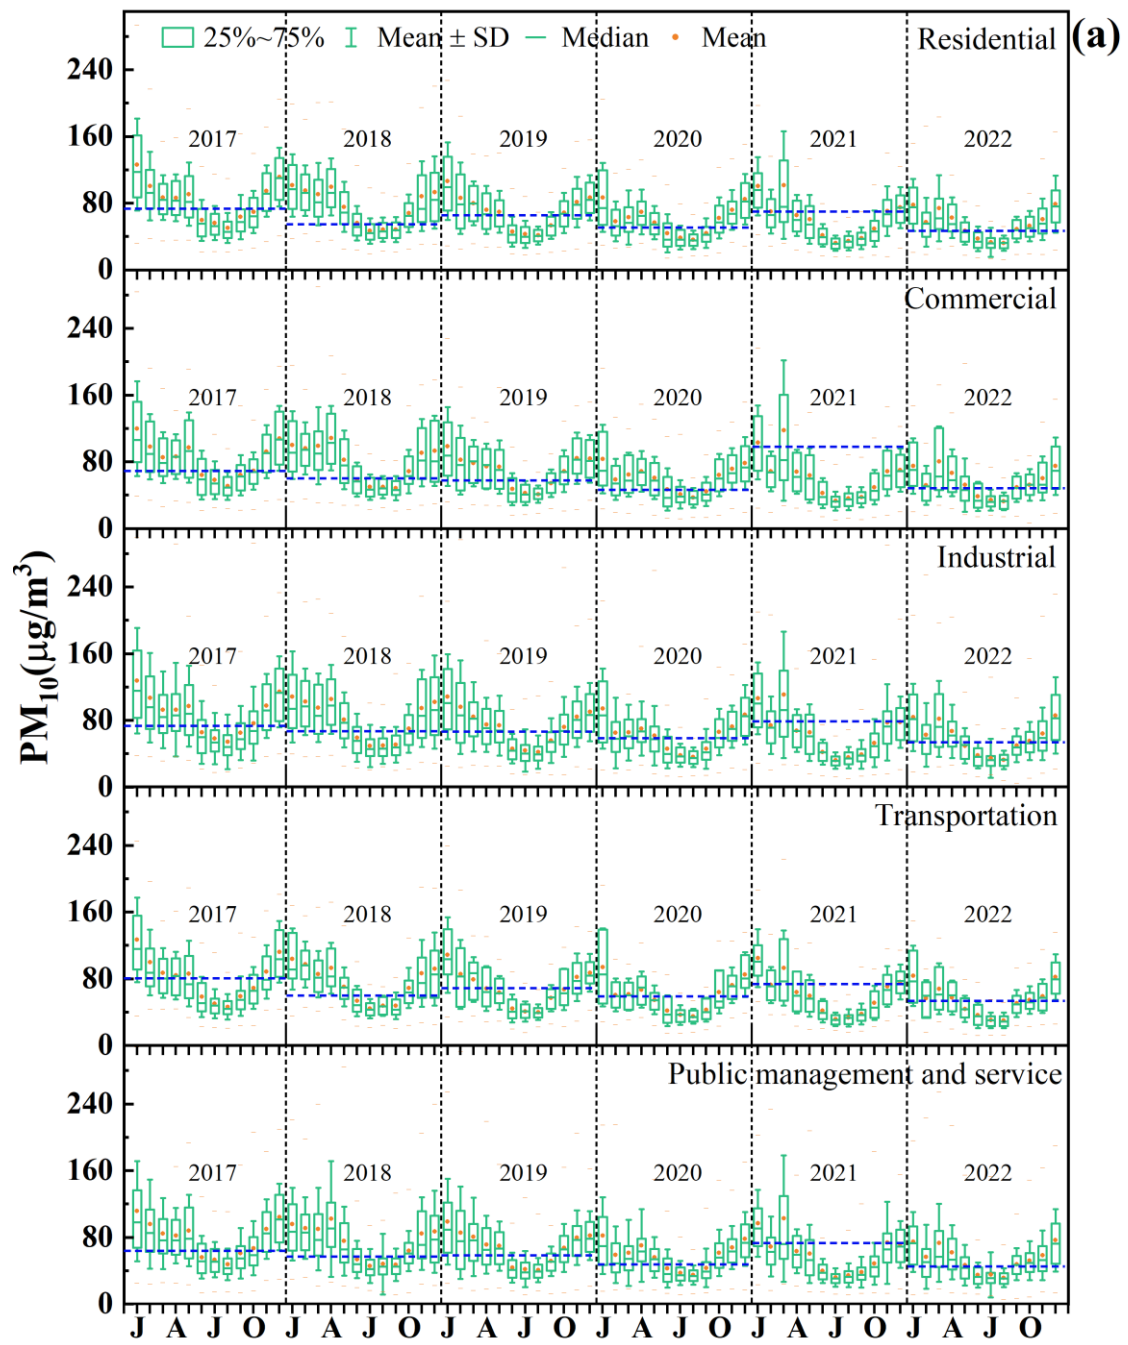

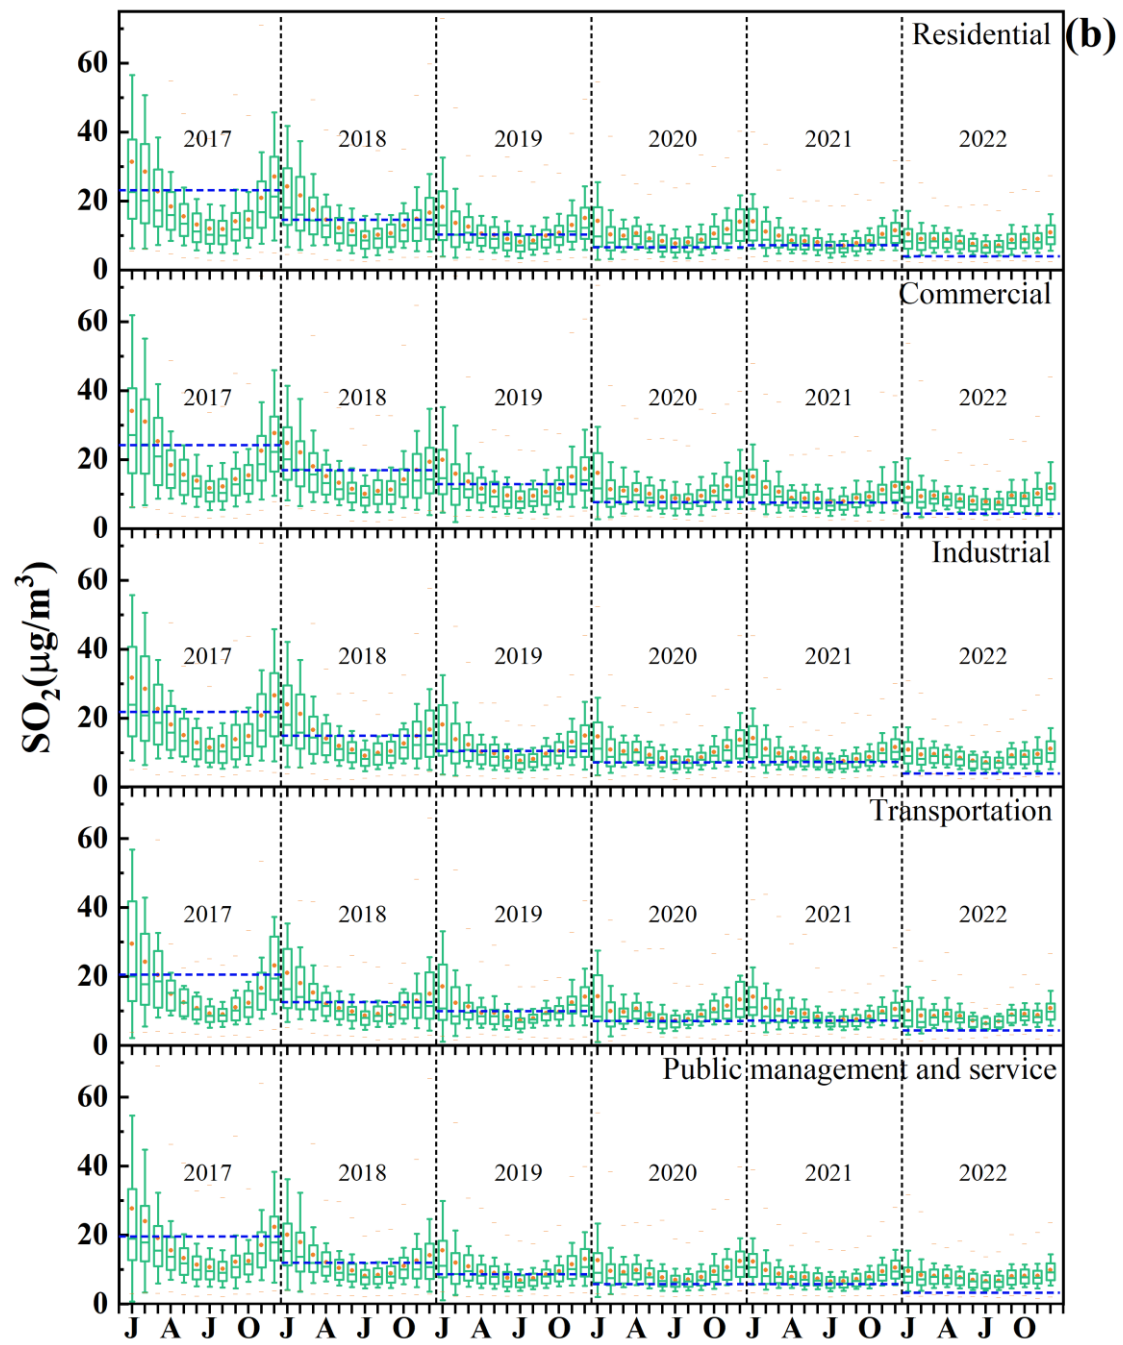

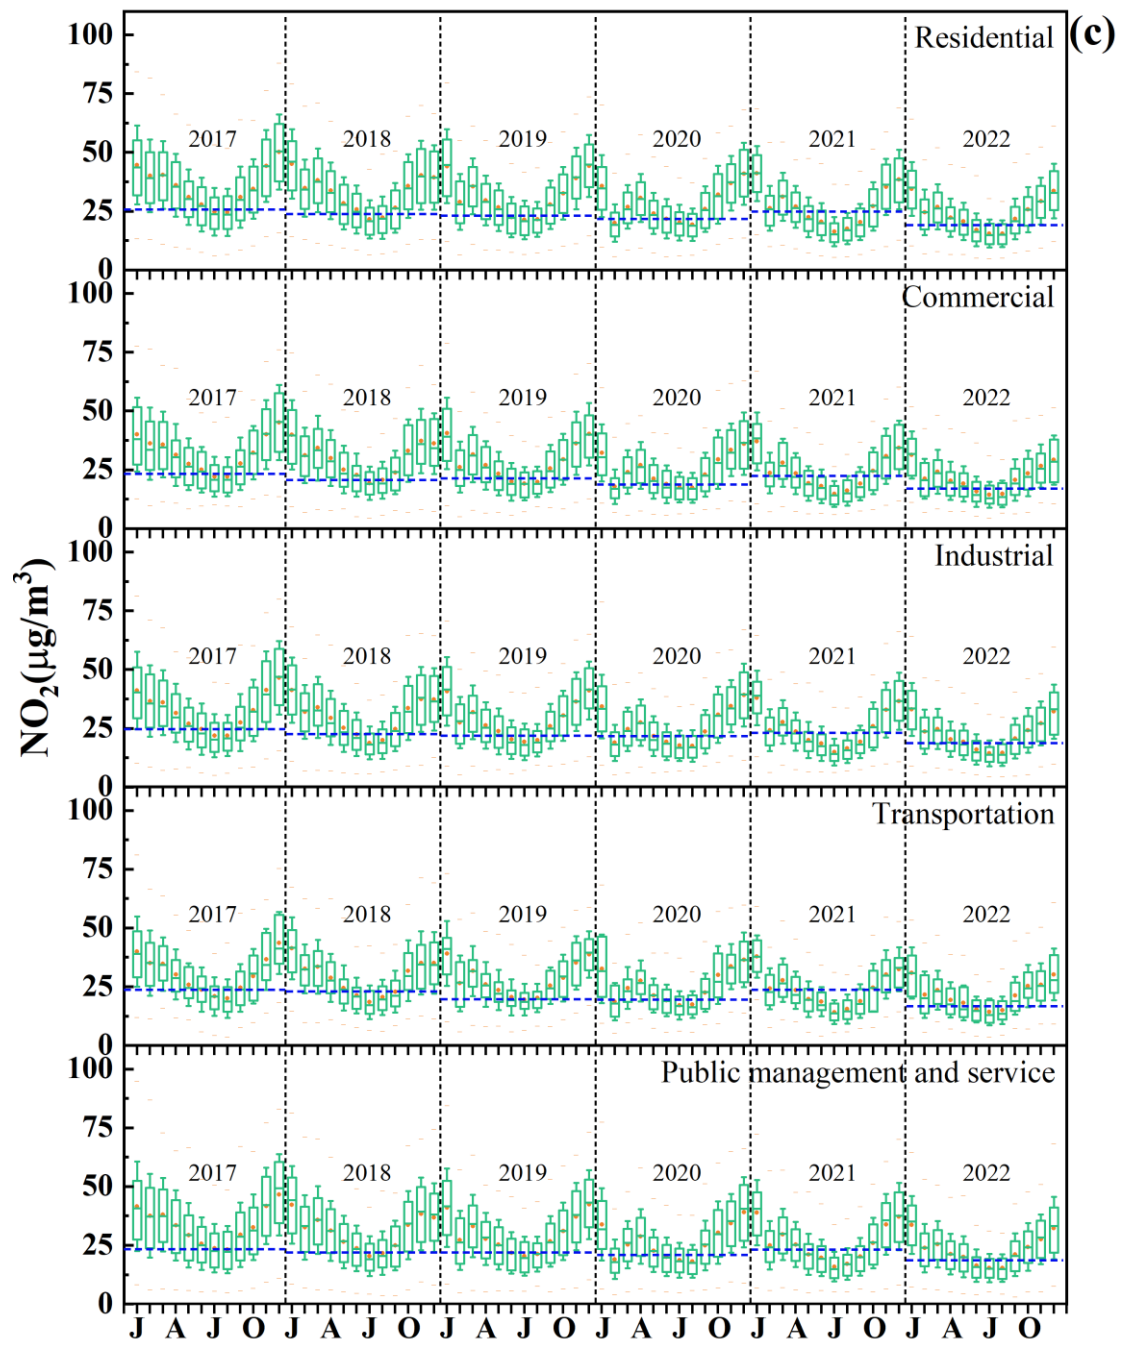

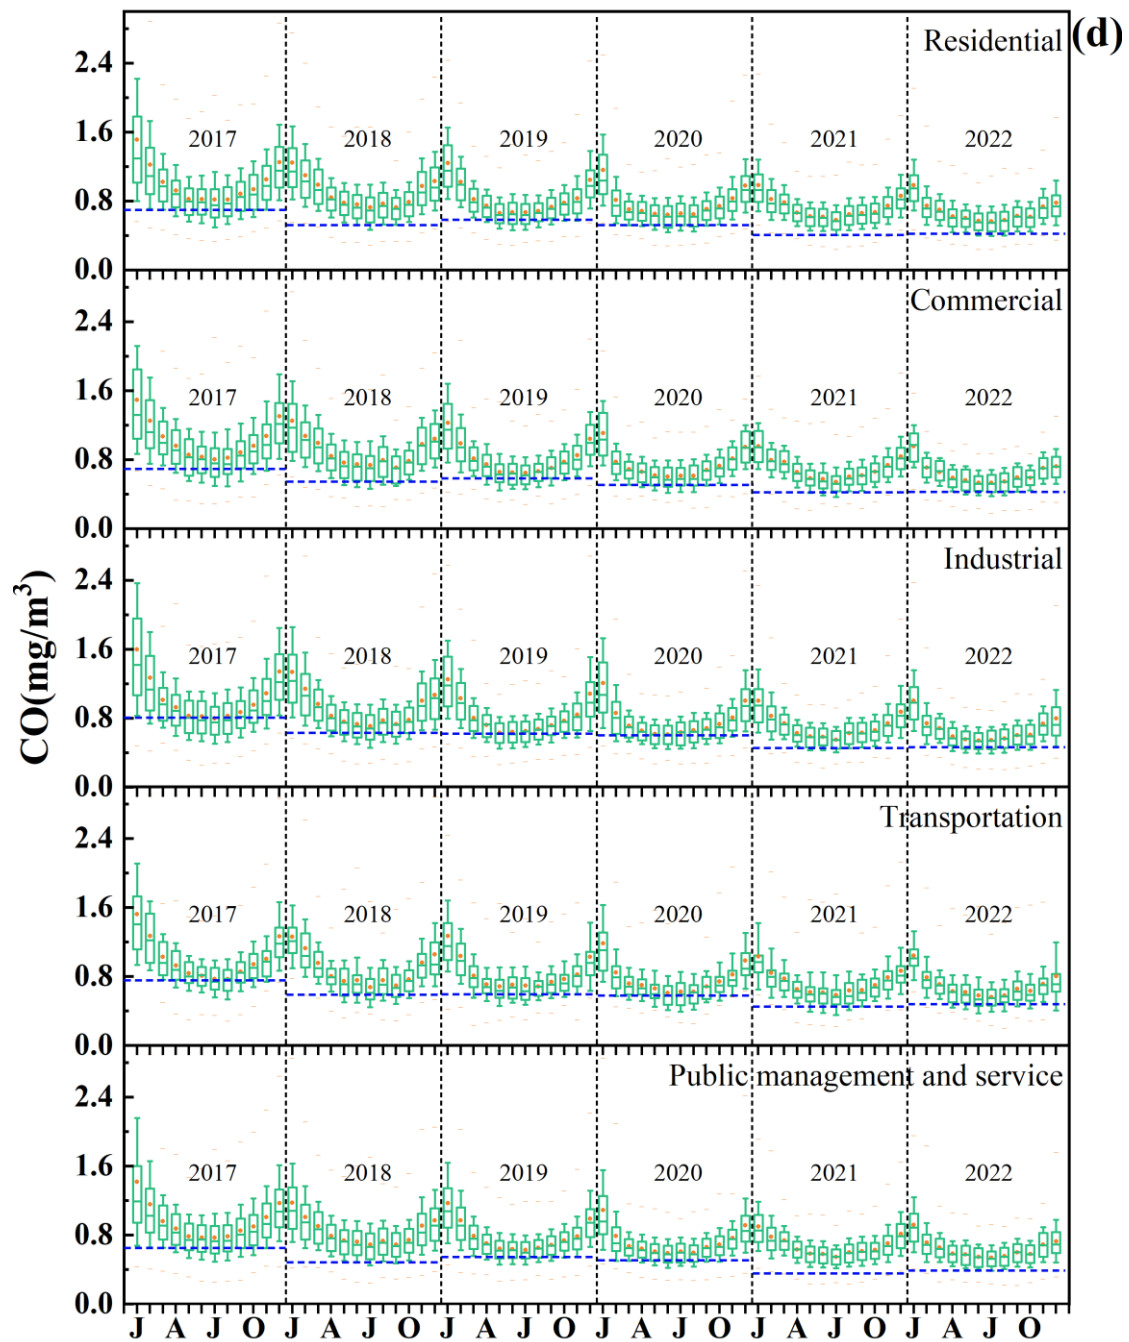

**Figure S2.** Seasonal variation trend of PM<sub>10</sub> (a), SO<sub>2</sub> (b), NO<sub>2</sub> (c), and CO (d) concentrations in various functional zones of Chinese cities. The dashed lines indicate the difference between the highest and lowest monthly mean concentration in the corresponding year.

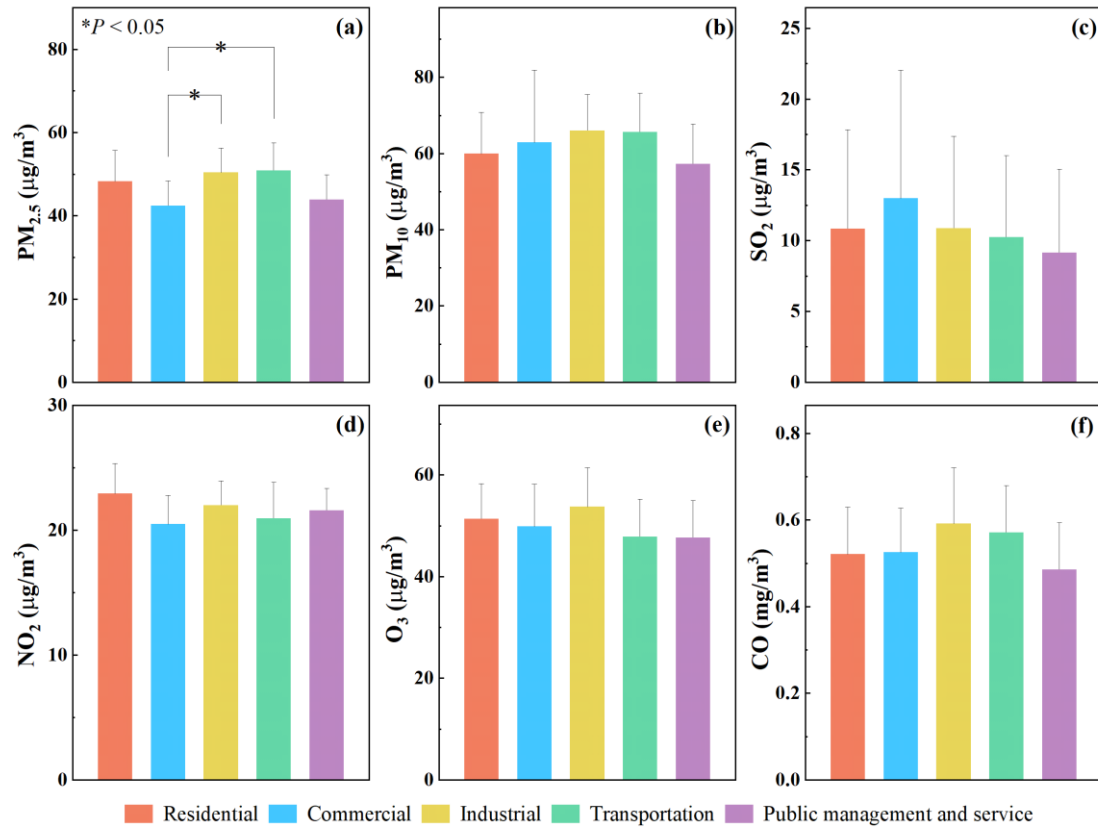

**Figure S3.** Statistical significance test of seasonal fluctuations of PM<sub>2.5</sub> (a), PM<sub>10</sub> (b), SO<sub>2</sub> (c), NO<sub>2</sub> (d), O<sub>3</sub> (e), and CO (f) in various functional zones of Chinese cities.

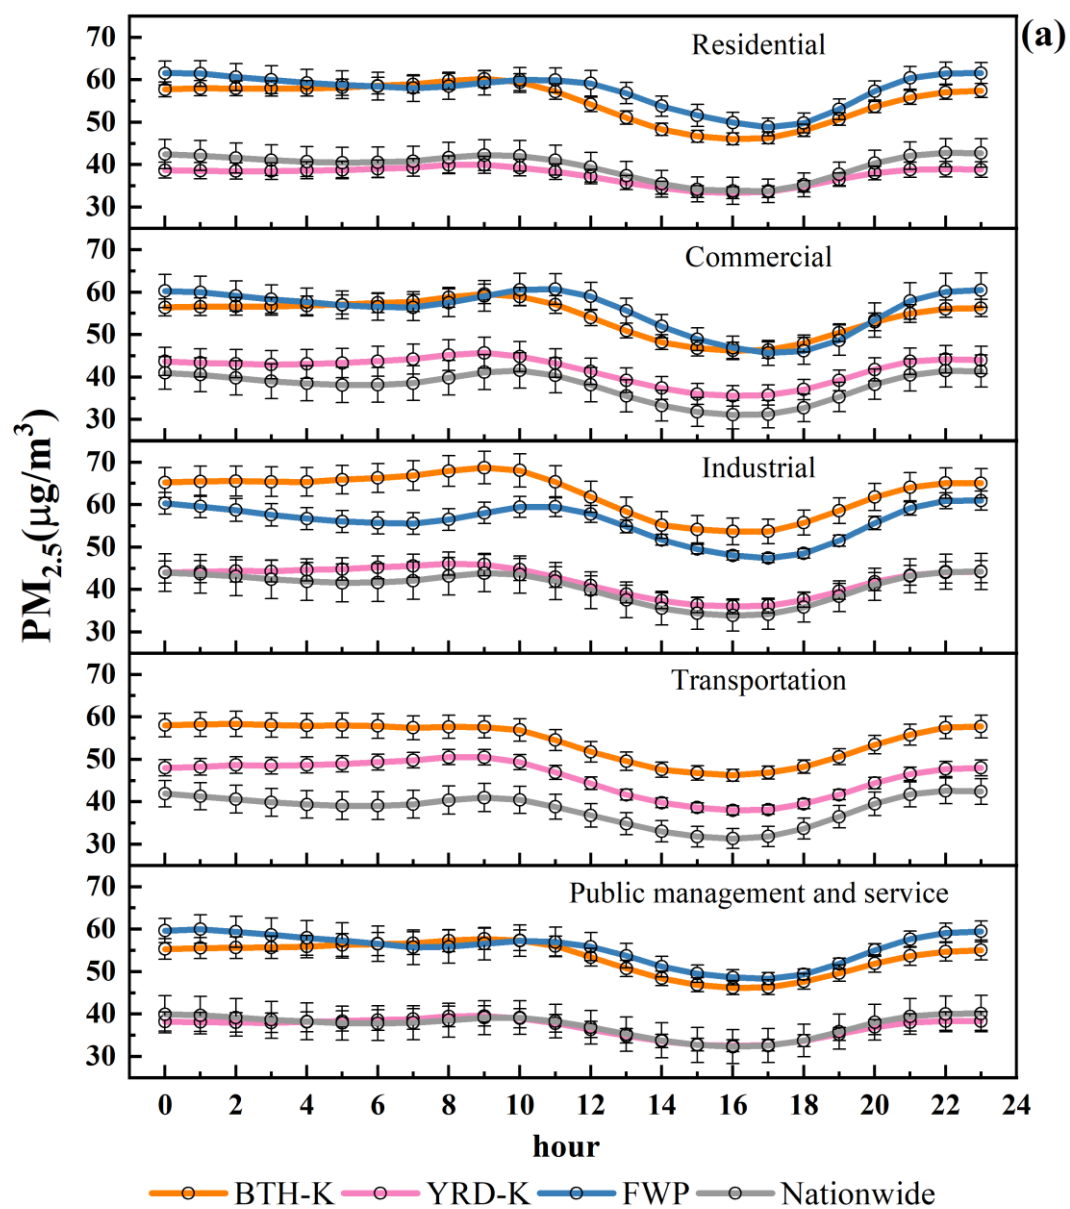



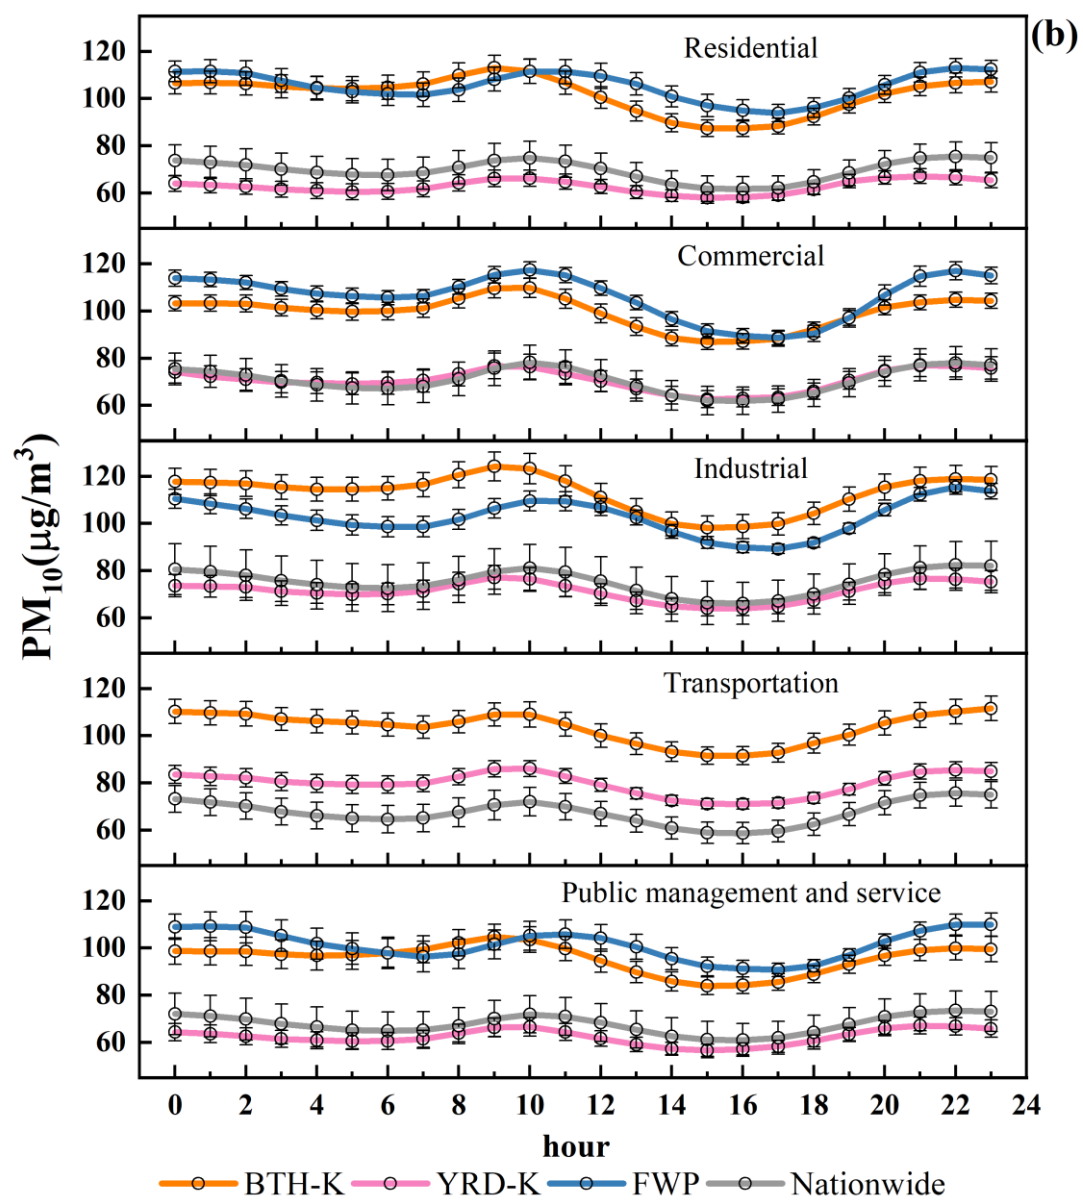

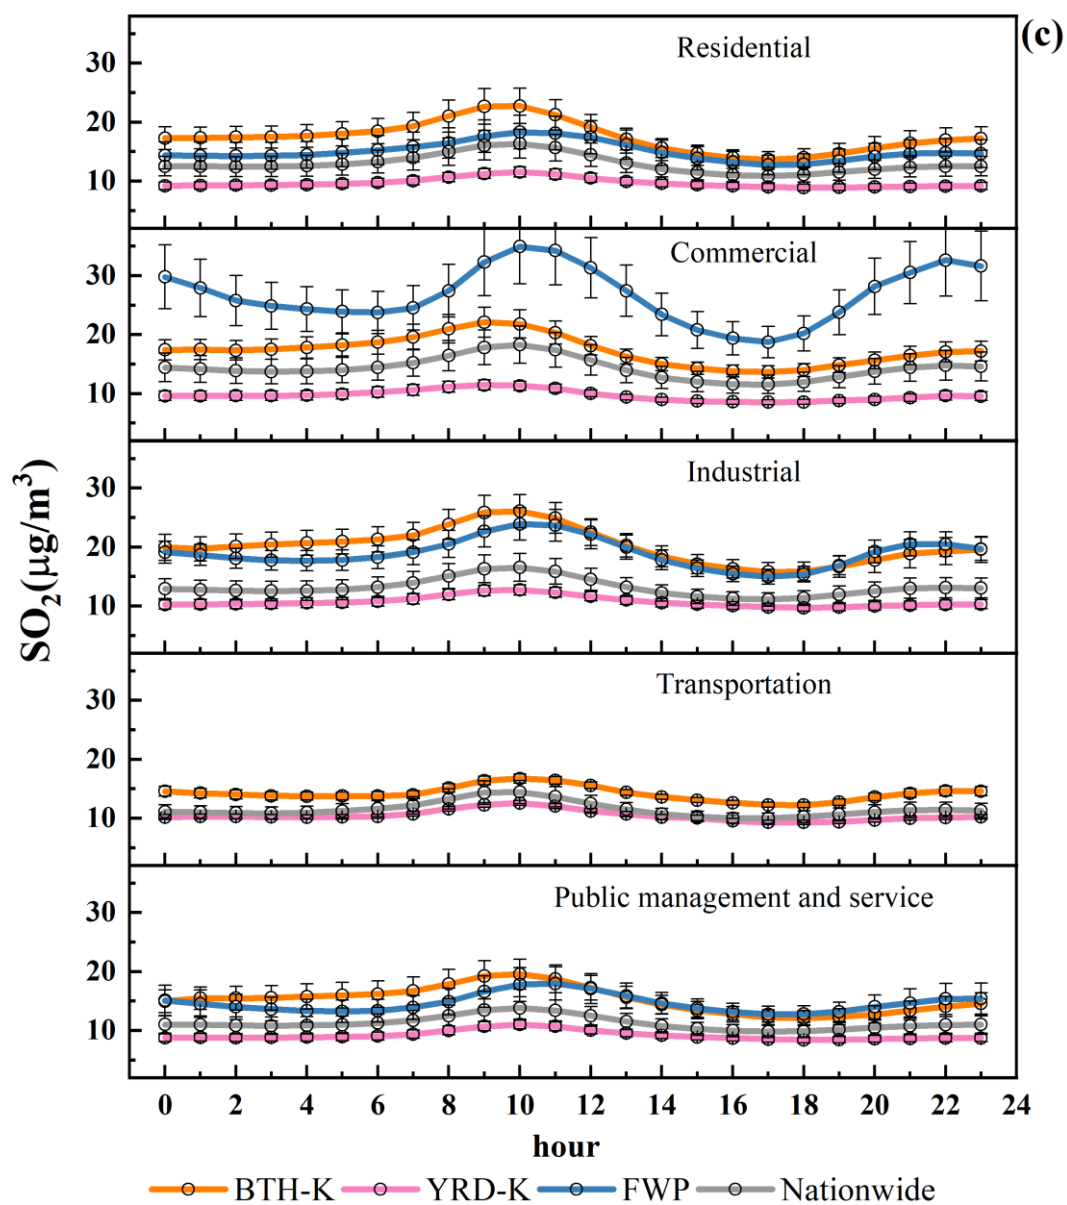

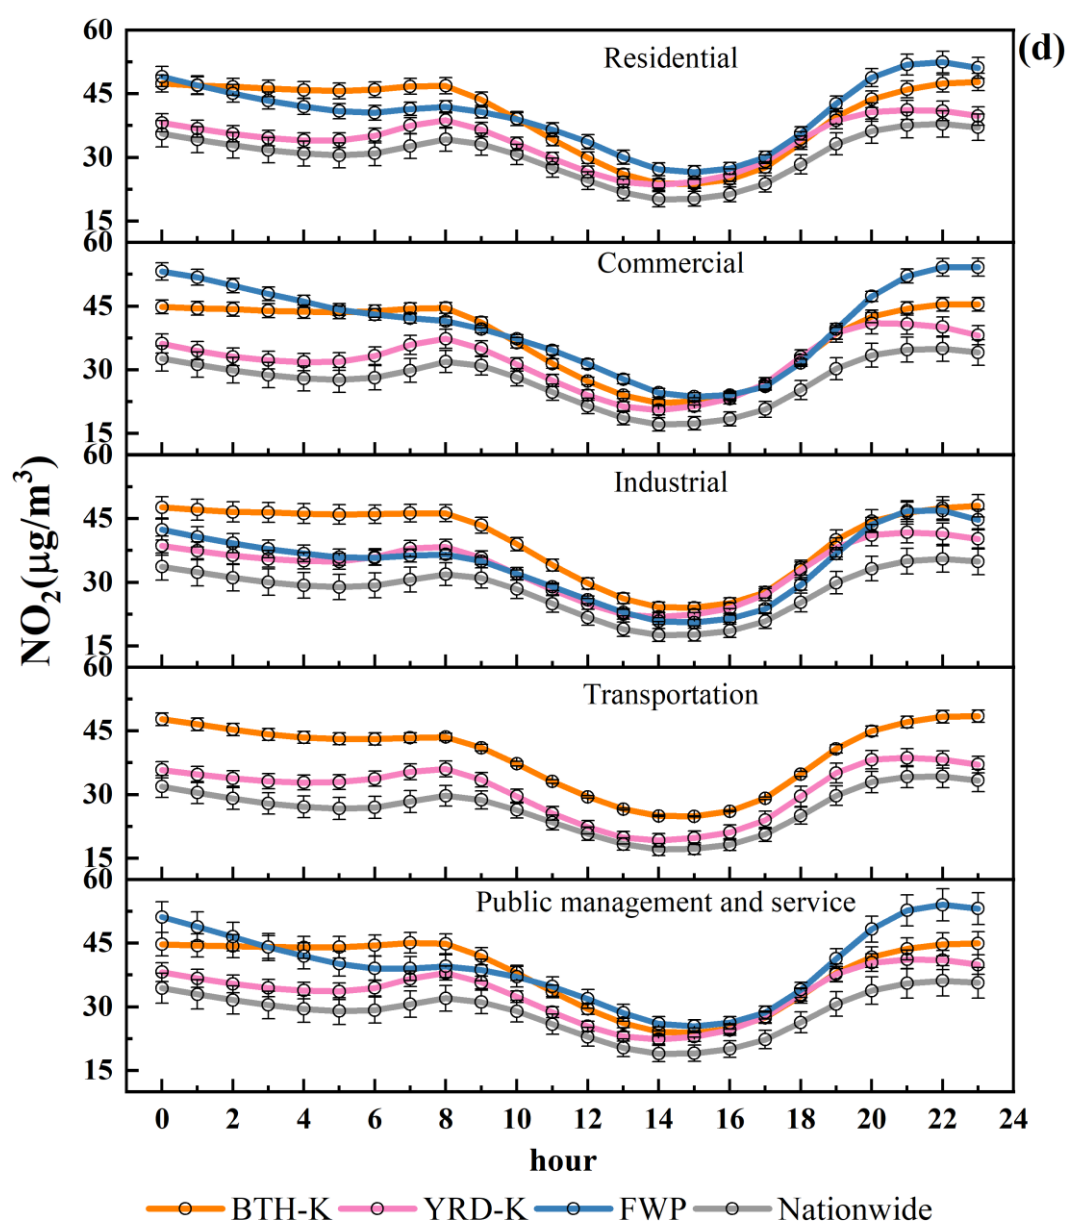

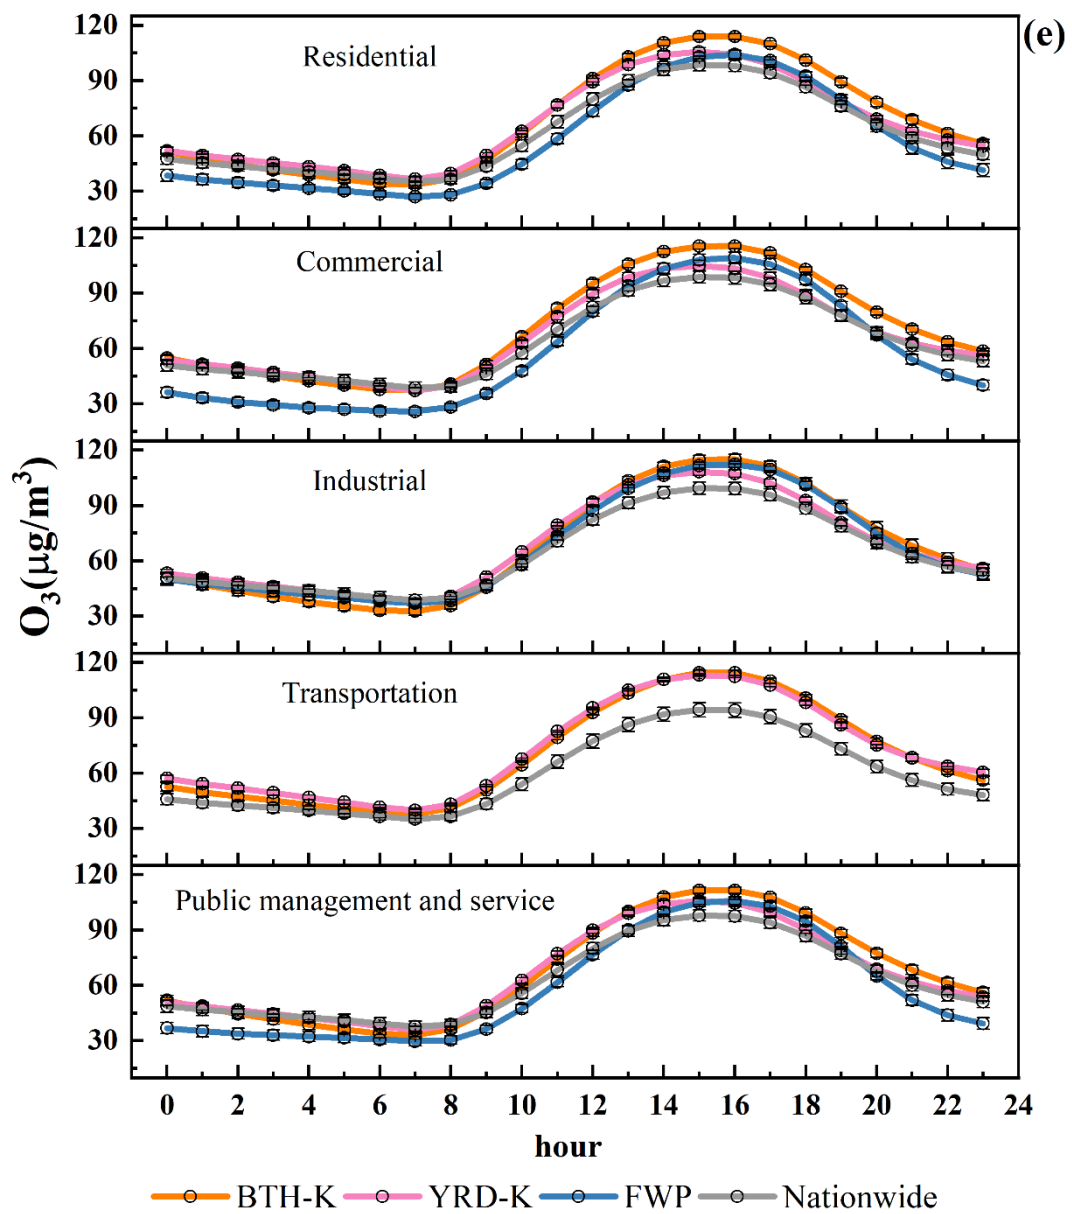

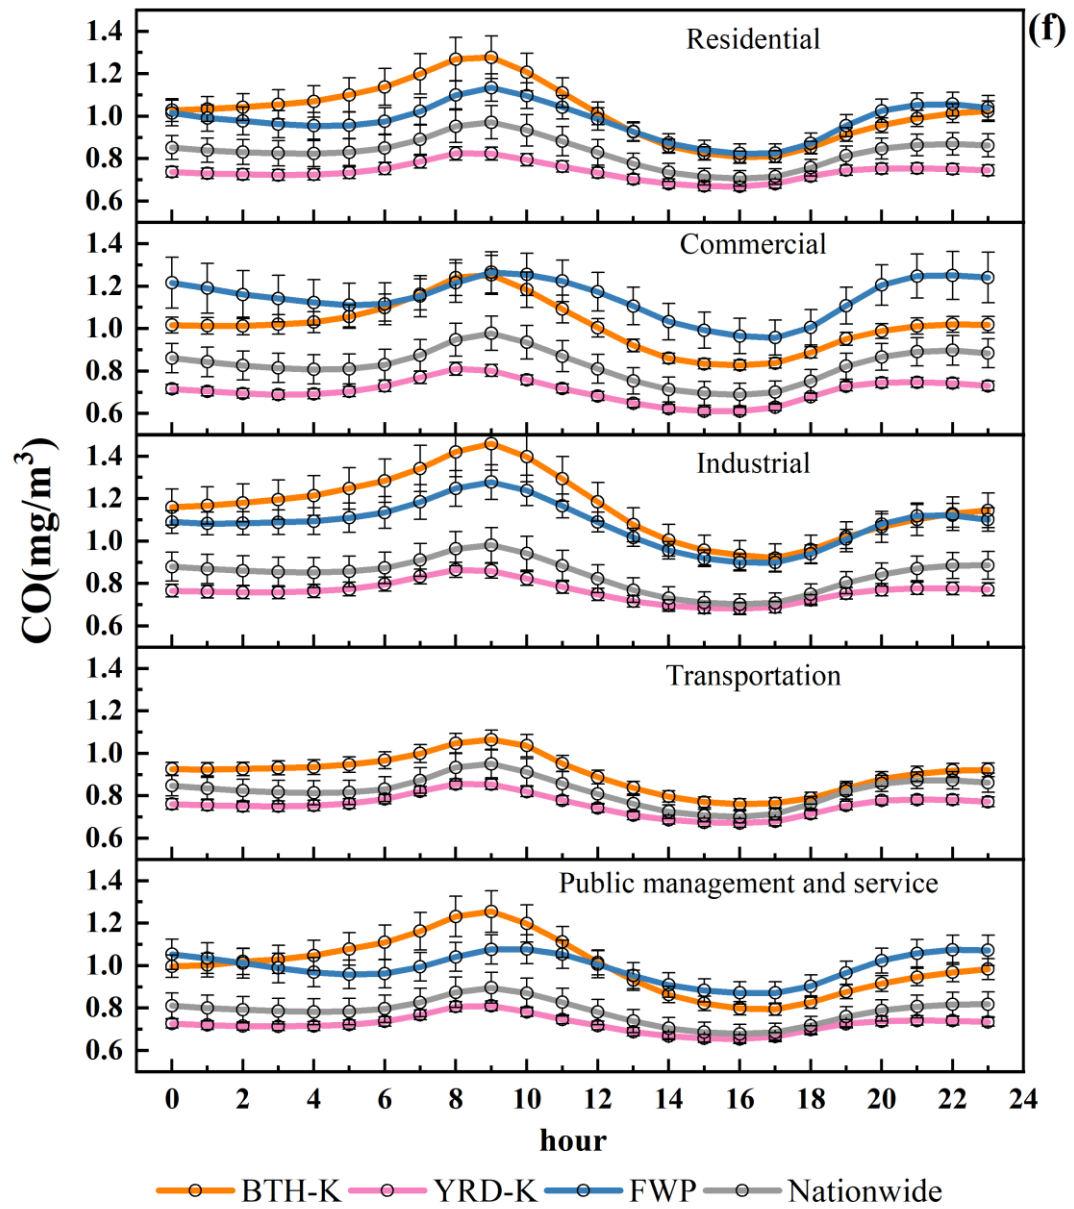

**Figure S4.** Daily variation curve of PM<sub>2.5</sub> (a), PM<sub>10</sub> (b), SO<sub>2</sub> (c), NO<sub>2</sub> (d), O<sub>3</sub> (e), and CO (f) concentrations in various functional zones of Chinese cities. BTH-K: Beijing-Tianjin-Hebei region and its surrounding areas; YRD-K: Yangtze River Delta region; FWP: Fen-Wei Plain.

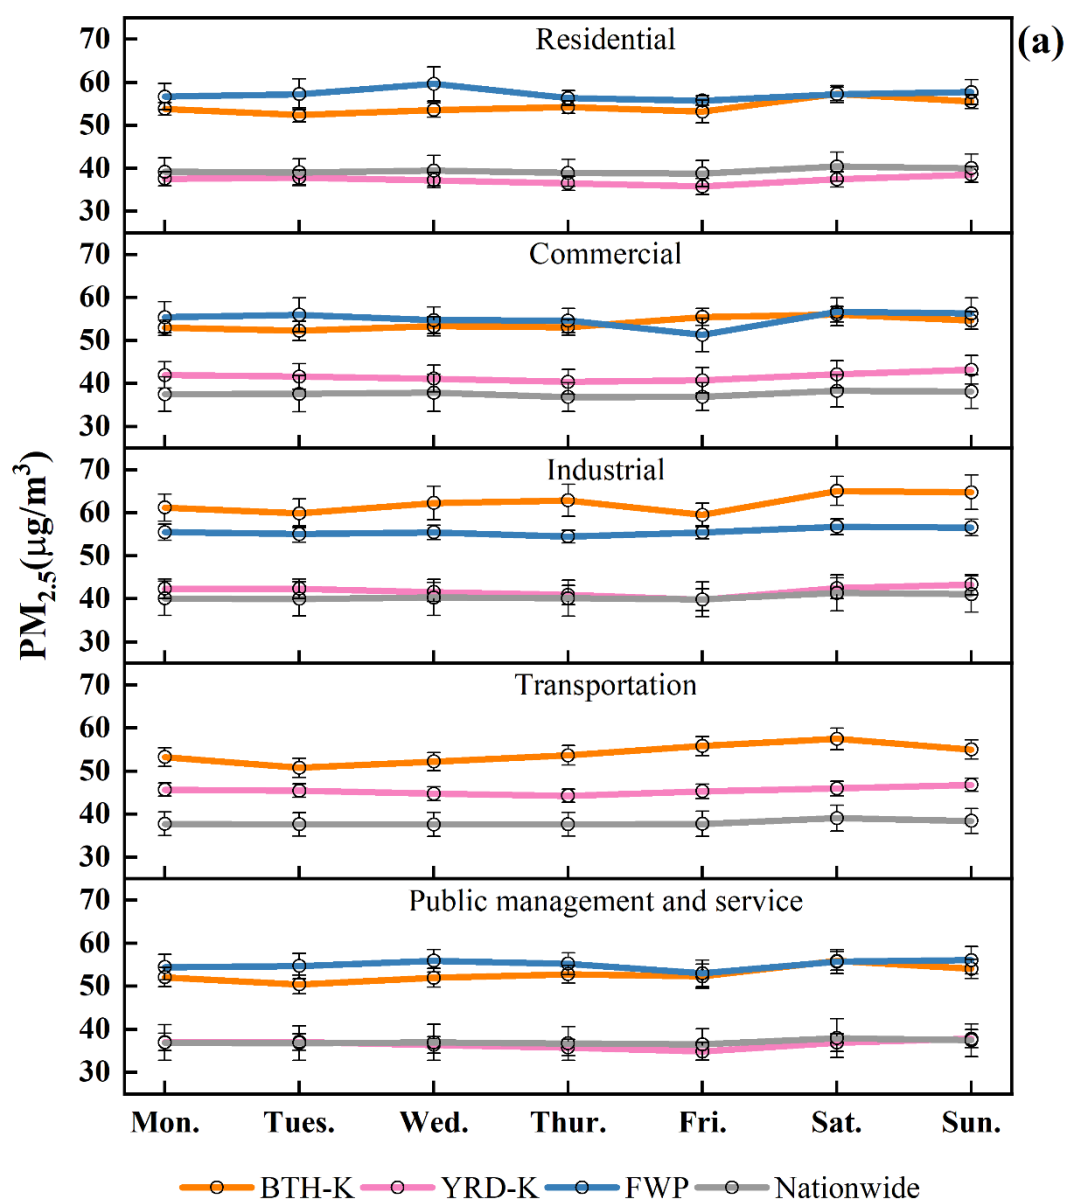

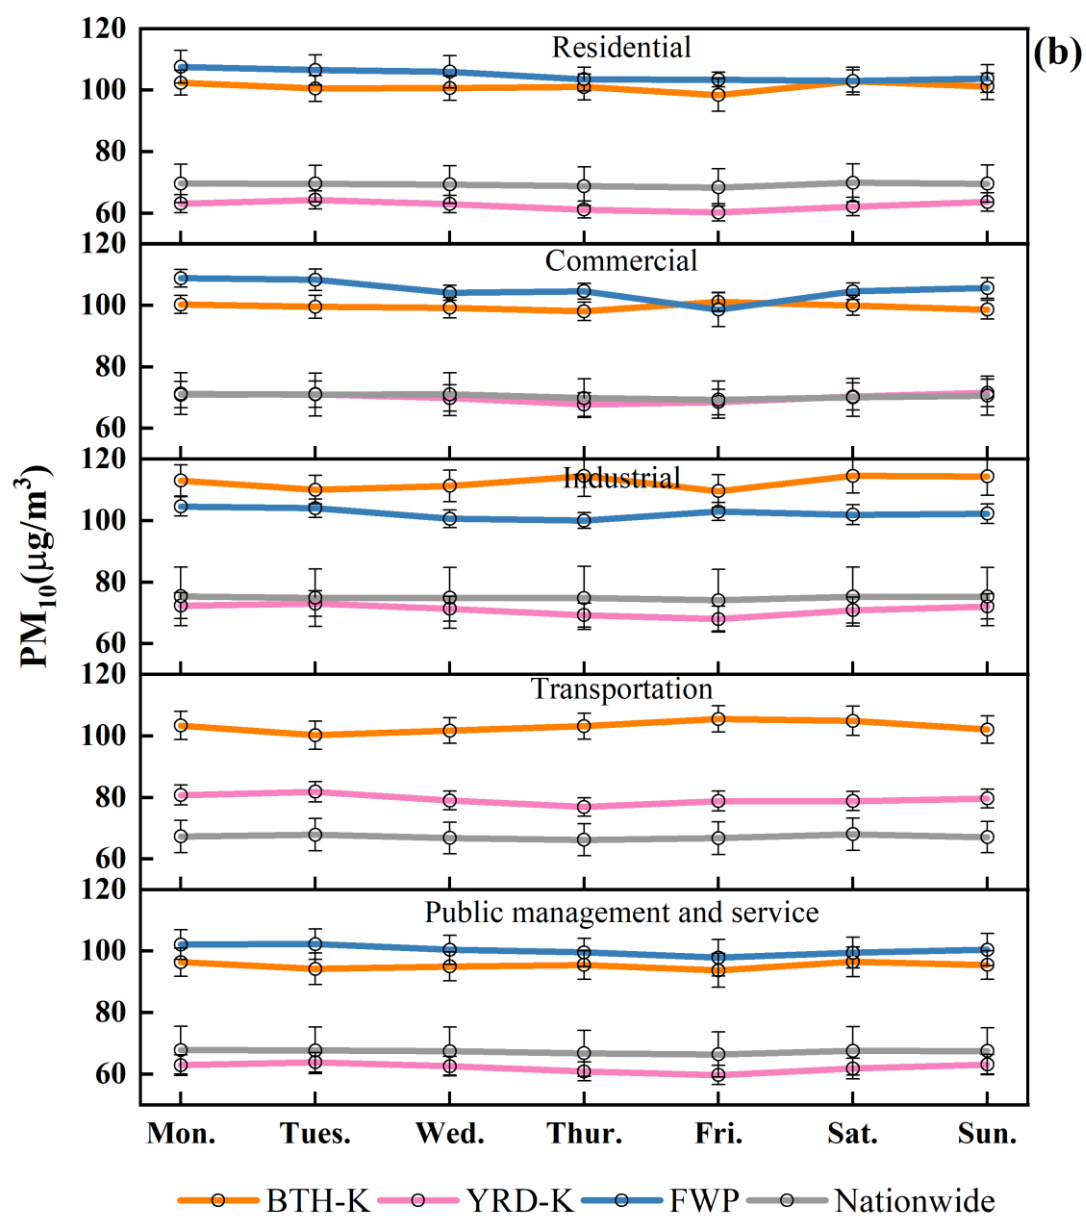

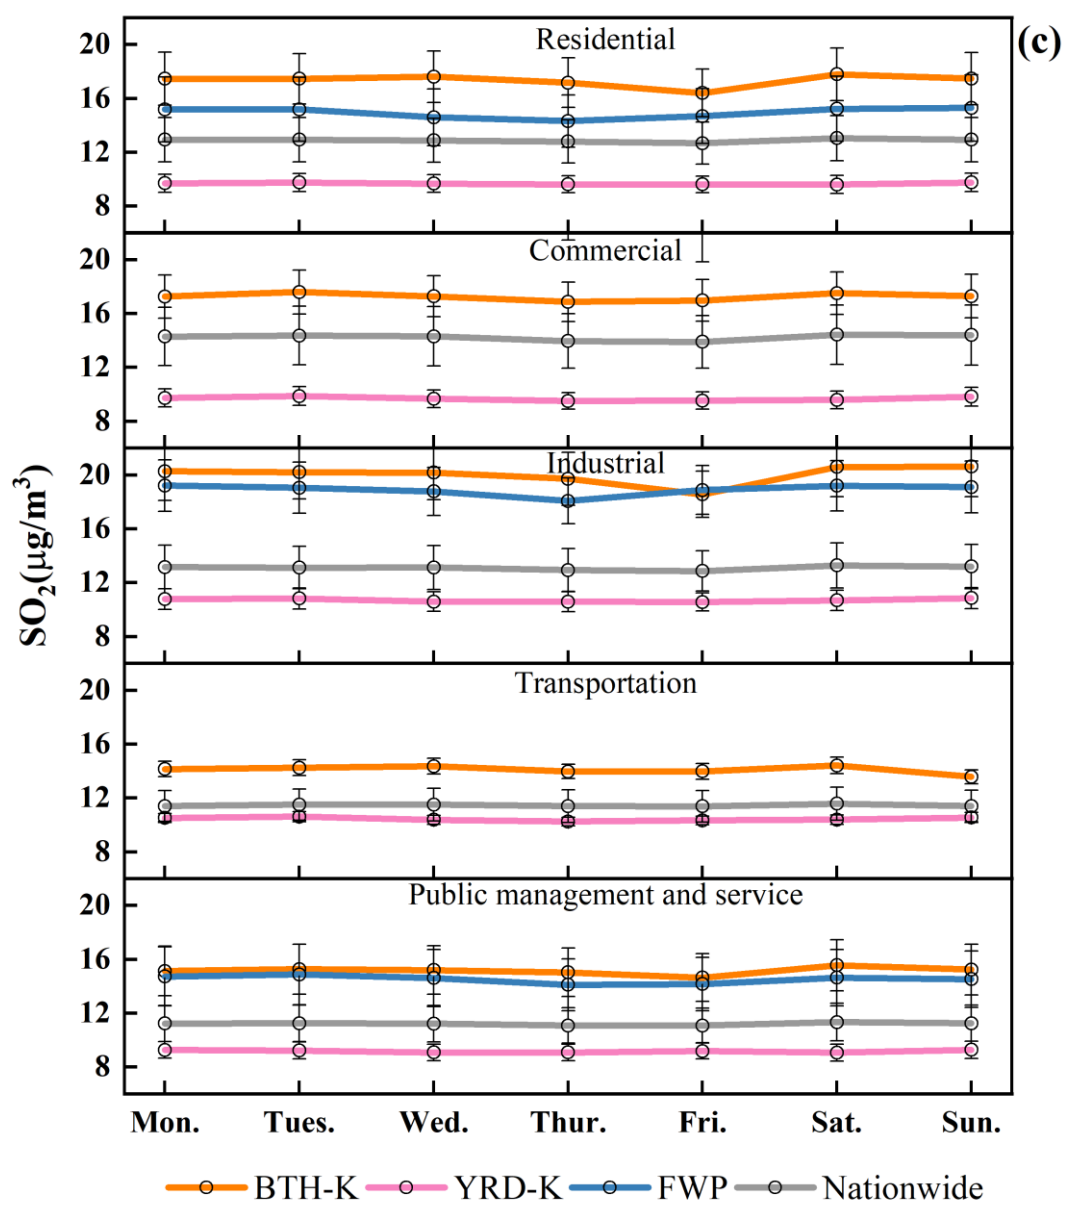



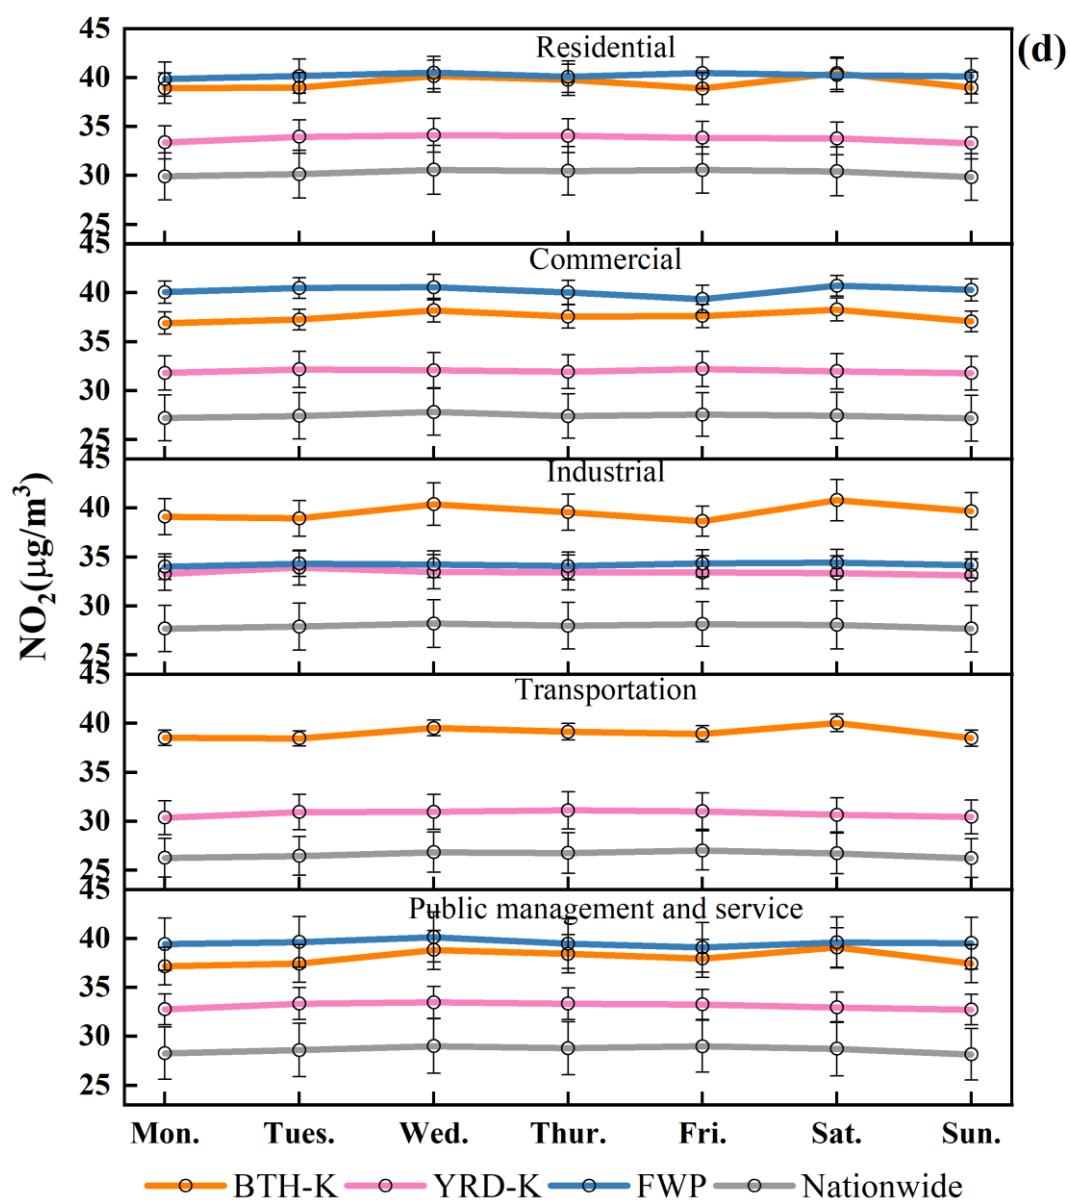

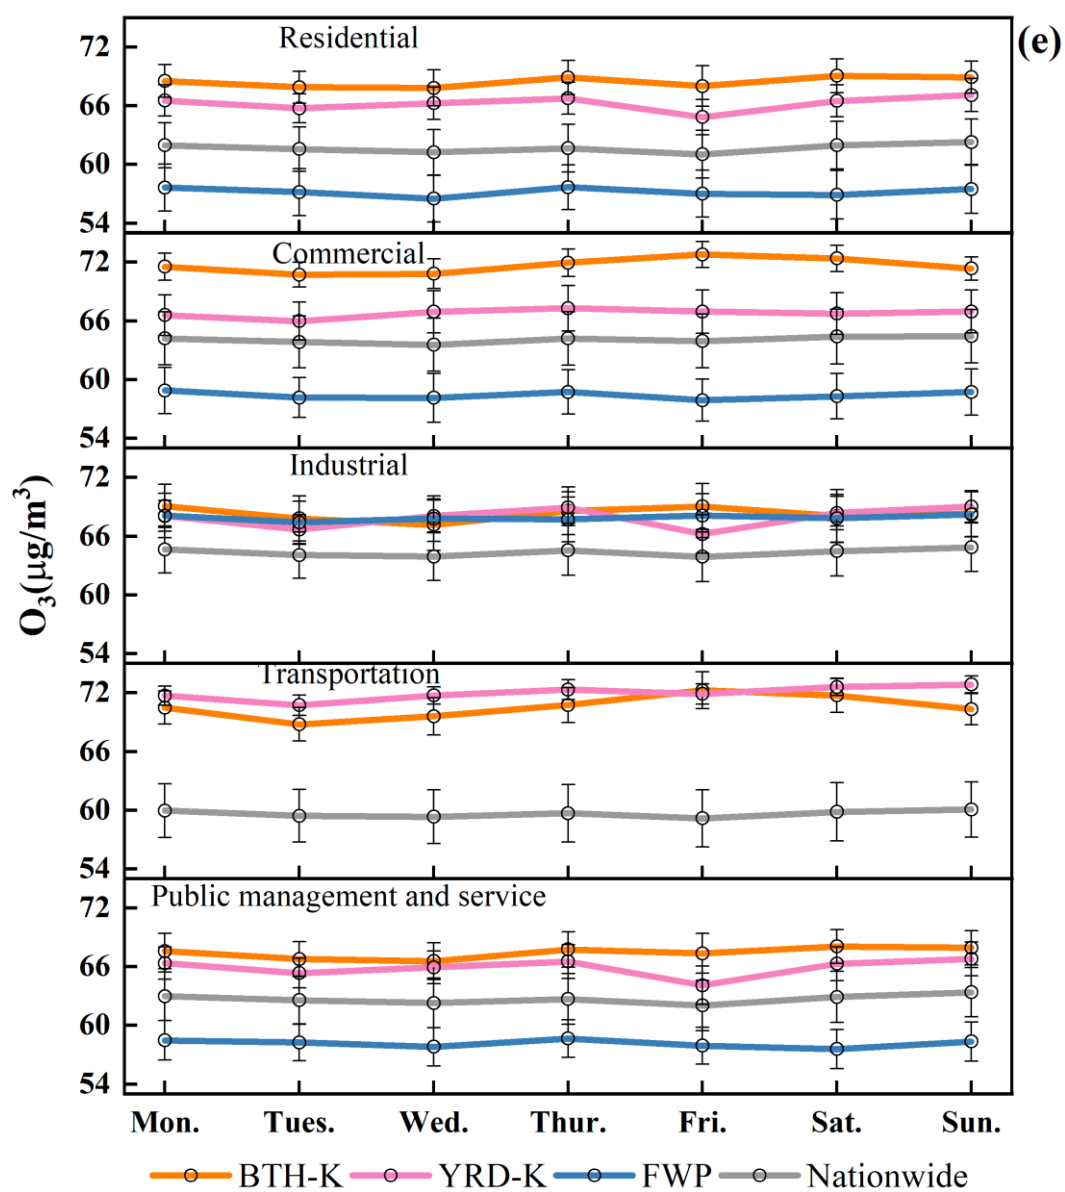

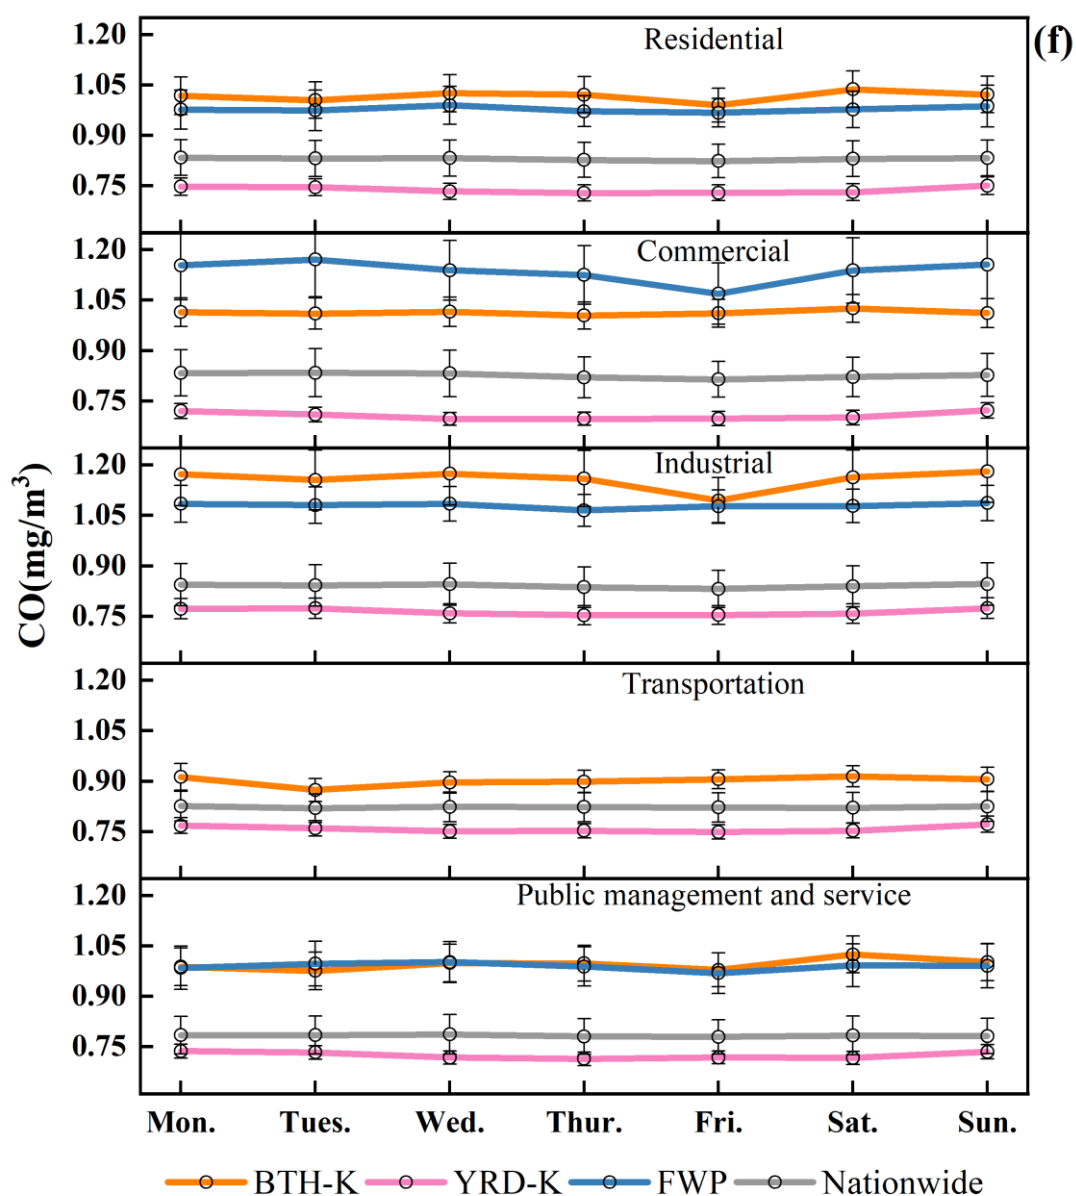

**Figure S5.** Weekly variation curve of PM<sub>2.5</sub> (a), PM<sub>10</sub> (b), SO<sub>2</sub> (c), NO<sub>2</sub> (d), O<sub>3</sub> (e), and CO (f) concentrations in various functional zones of Chinese cities. BTH-K: Beijing-Tianjin-Hebei region and its surrounding areas; YRD-K: Yangtze River Delta region; FWP: Fen-Wei Plain.

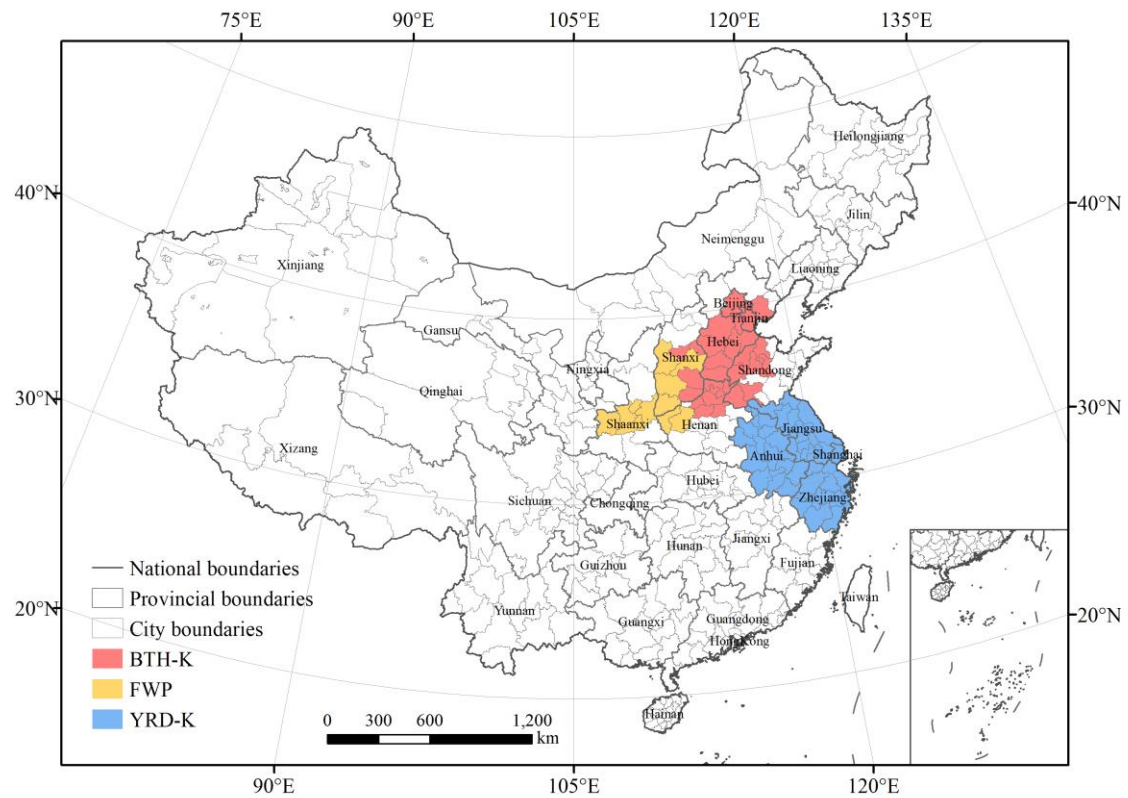

**Figure S6.** Three key areas for air pollution control in China: the Beijing-Tianjin-Hebei region and its surrounding areas (BTH-K), the Fen-Wei Plain (FWP), and the Yangtze River Delta region (YRD-K).
